# Supplementary material for: New insights into the photocyclization reaction of a popular diarylethene switch: a nonadiabatic molecular dynamics study
Source: Royal Society of Chemistry journal article supplement (doi:10.1039/d3cp06256b), 2024-01-01
Supplement: d3cp06256b1.pdf [file d3cp06256b1.pdf]

Electronic Supporting Information for  
**New insights into the photocyclization reaction of  
a popular diarylethene switch - a nonadiabatic  
molecular dynamics study**

M. Martyka<sup>1,2</sup> and J. Jankowska<sup>\*,1</sup>

<sup>1</sup>Faculty of Chemistry, University of Warsaw, Pasteura 1, Warsaw, 02-093, Poland

<sup>2</sup>Interdisciplinary Doctoral School, University of Warsaw, Dobra 56/66, Warsaw,  
00-312, Poland.

## Contents

|                                                                                        |            |
|----------------------------------------------------------------------------------------|------------|
| <b>S1 Orbital active spaces (AS) used in ODM2/MRCI calculations</b>                    | <b>S2</b>  |
| <b>S2 Orbital active spaces (AS) used in QD-NEVPT2 calculations</b>                    | <b>S7</b>  |
| <b>S3 DFT benchmark calculations</b>                                                   | <b>S9</b>  |
| S3.1 Geometry optimisations . . . . .                                                  | S9         |
| S3.2 Cartesian coordinates . . . . .                                                   | S10        |
| <b>S4 Ground-state population fitting</b>                                              | <b>S19</b> |
| <b>S5 Dynamic sampling procedure</b>                                                   | <b>S21</b> |
| <b>S6 Solvent shifts</b>                                                               | <b>S23</b> |
| <b>S7 Cartesian coordinates of key forms of PT optimised at the ODM2/MRCI-SD level</b> | <b>S23</b> |

## S1 Orbital active spaces (AS) used in ODM2/MRCI calculations

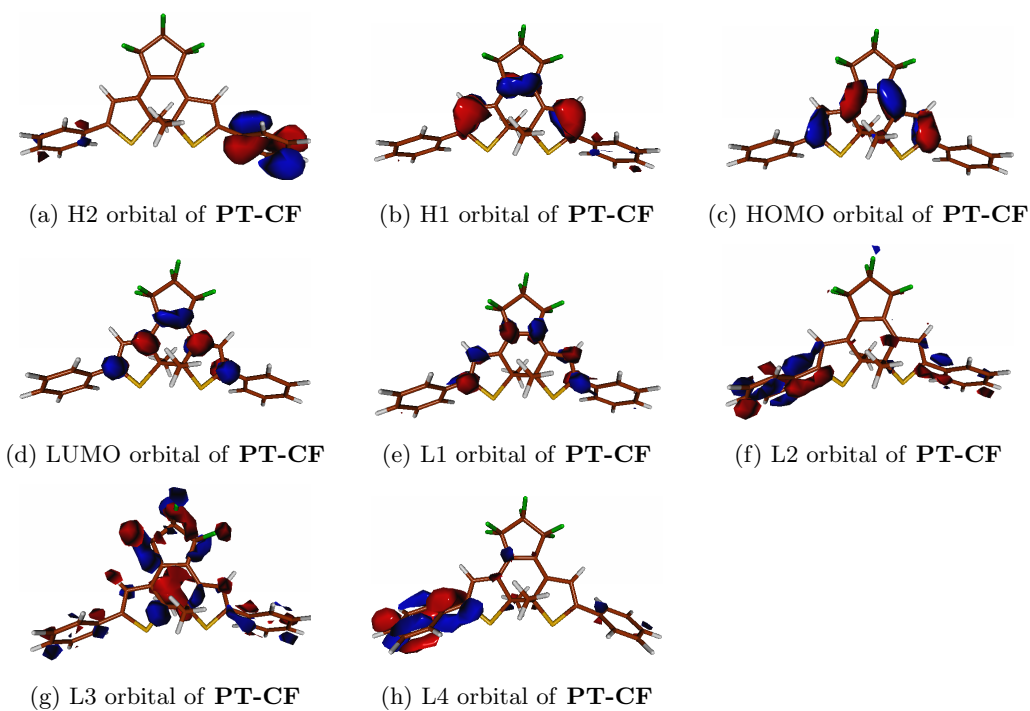

Figure S1: Active space orbitals of **PT-CF** used in ODM2/MRCI calculations. These orbitals have been optimized for an open-shell singlet configuration, with the HOMO and LUMO orbitals each occupied by one electron (H-L).

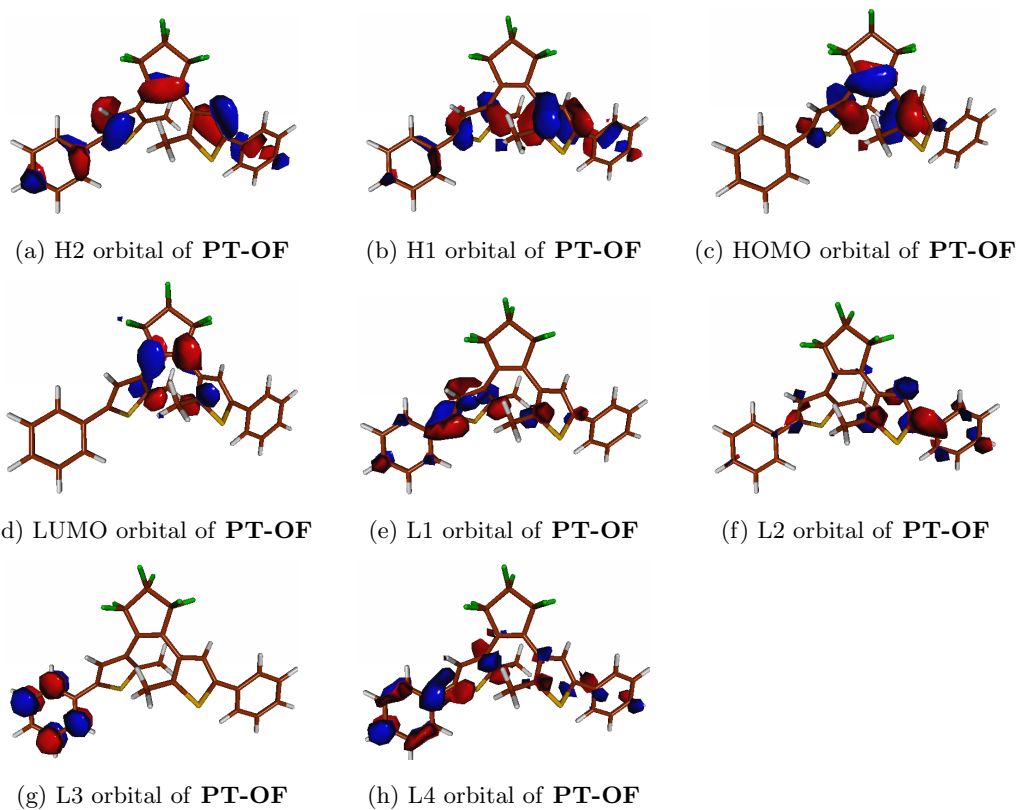

Figure S2: Active space orbitals of **PT-OF** used in ODM2/MRCI calculations. These orbitals have been optimized for an open-shell singlet configuration, with the HOMO and LUMO orbitals each occupied by one electron (H-L).

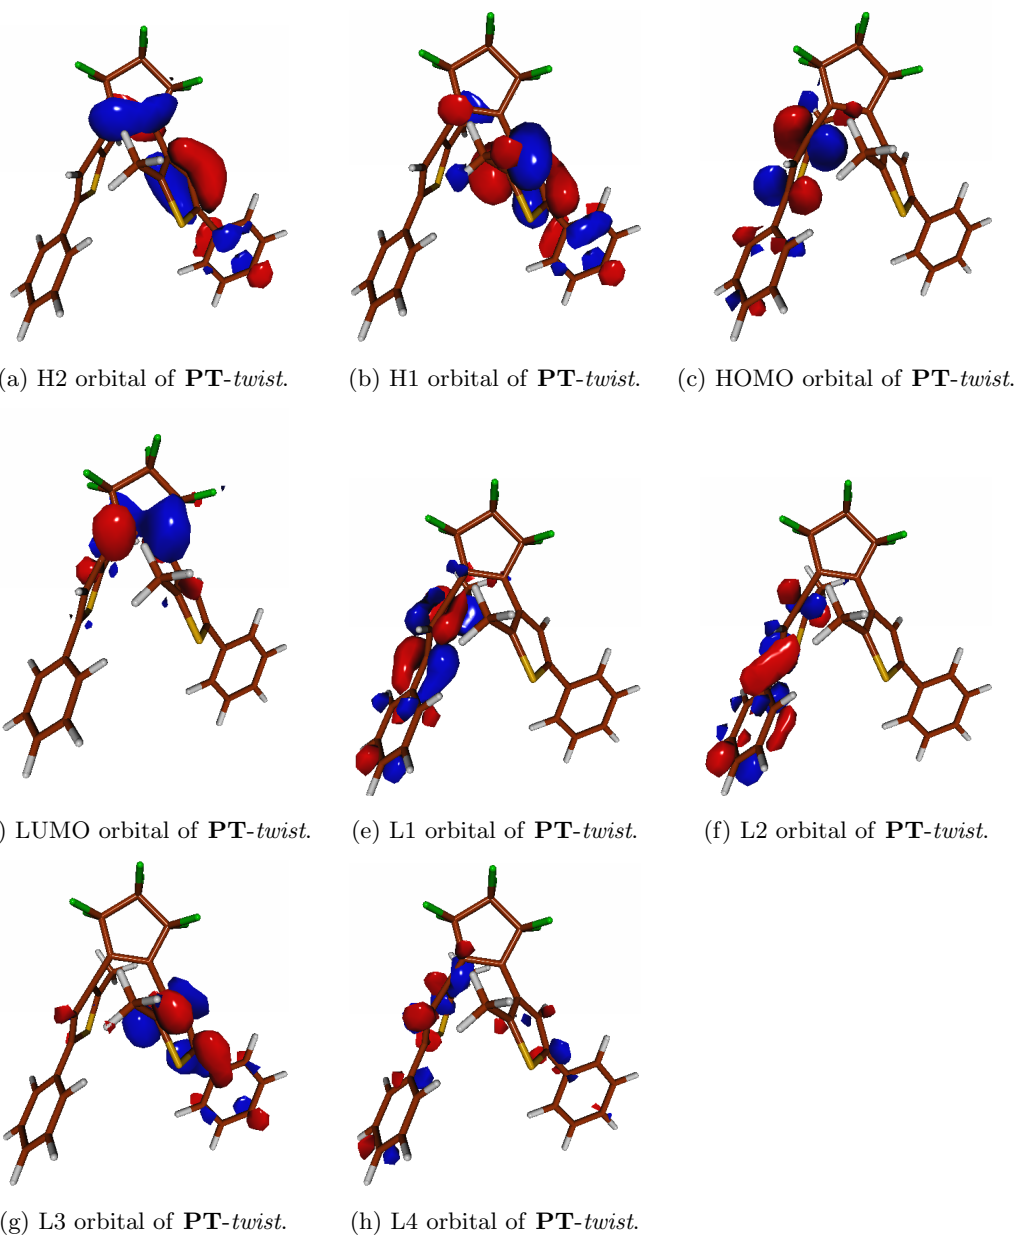

Figure S3: Active space orbitals of **PT-twist**, at the  $S_1$  local minimum, used in ODM2/MRCI calculations. These orbitals have been optimized for an open-shell singlet configuration, with the HOMO and LUMO orbitals each occupied by one electron (H-L).

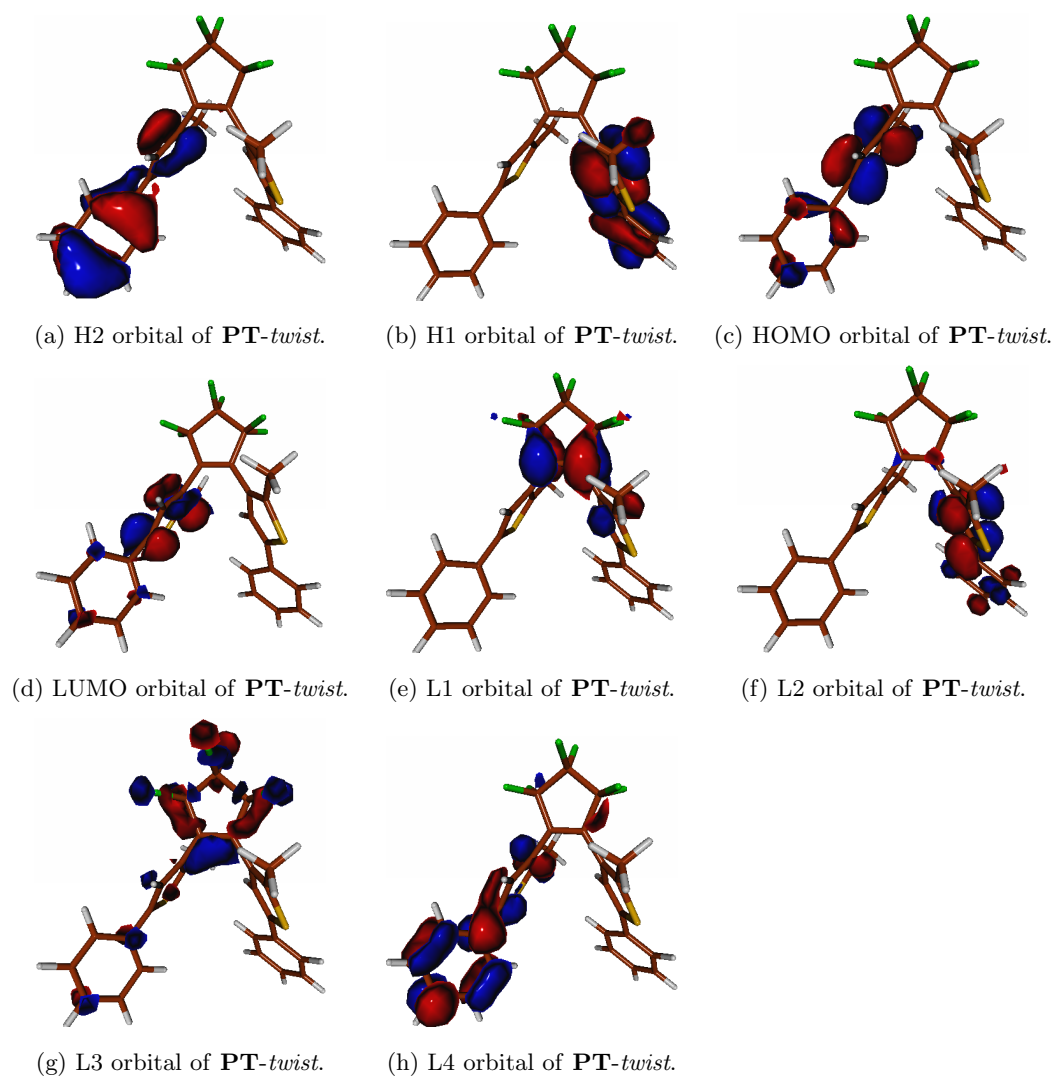

Figure S4: Active space orbitals of **PT-twist**, at the  $S_0$  local minimum, used in ODM2/MRCI calculations. These orbitals have been optimized for an open-shell singlet configuration, with the HOMO and LUMO orbitals each occupied by one electron (H-L).

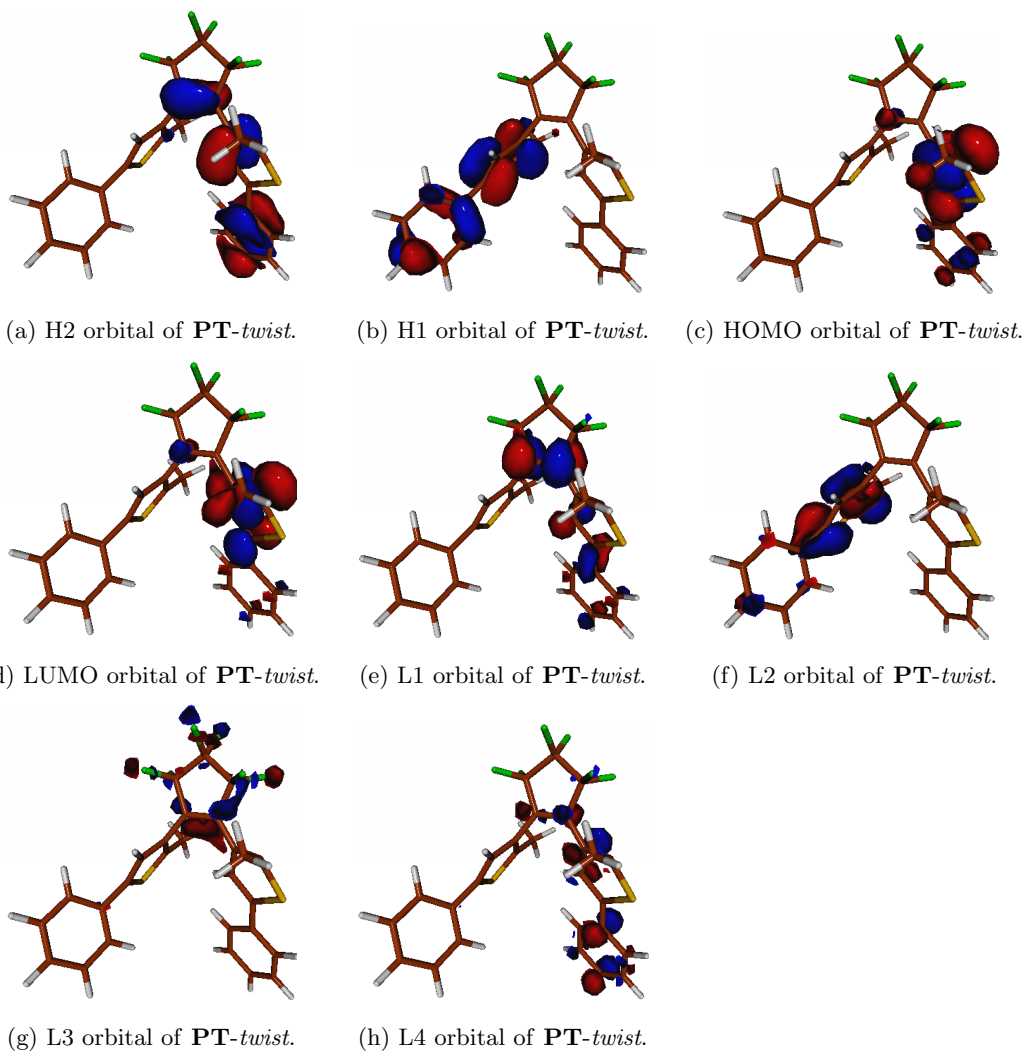

Figure S5: Active space orbitals of **PT-twist**, at the  $T_1$  local minimum, used in ODM2/MRCI calculations. These orbitals have been optimized for an open-shell singlet configuration, with the HOMO and LUMO orbitals each occupied by one electron (H-L).

## S2 Orbital active spaces (AS) used in QD-NEVPT2 calculations

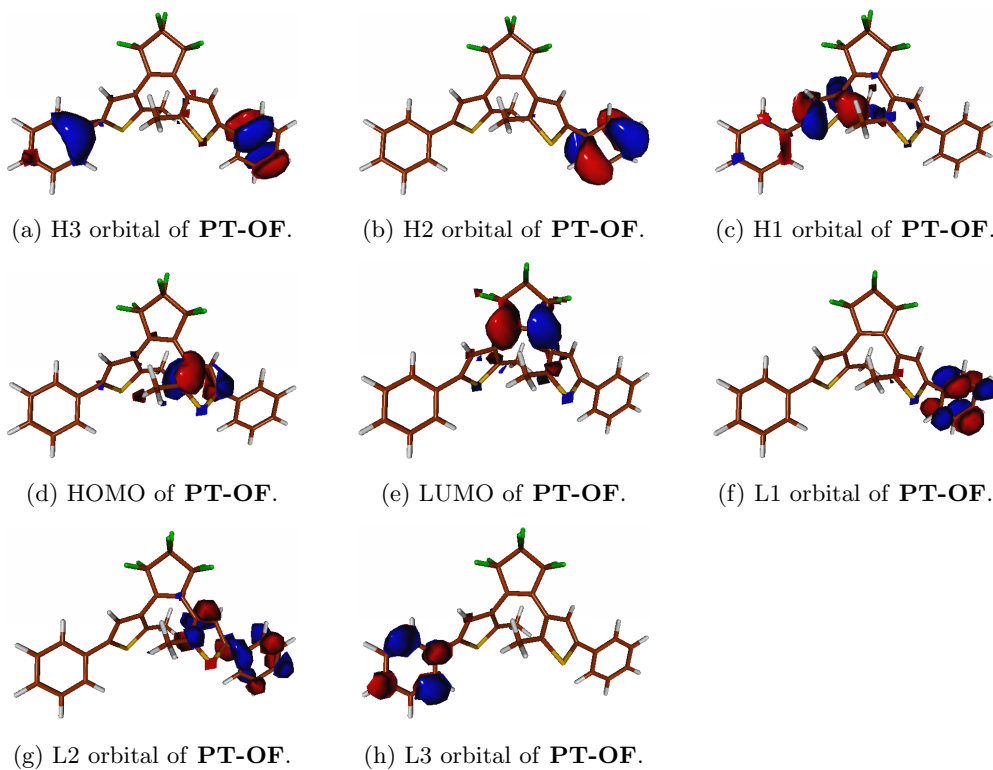

Figure S6: Active space orbitals of **PT-OF** used in QD-NEVPT2 calculations. The averaging was performed over the three lowest singlet states with equal weights.

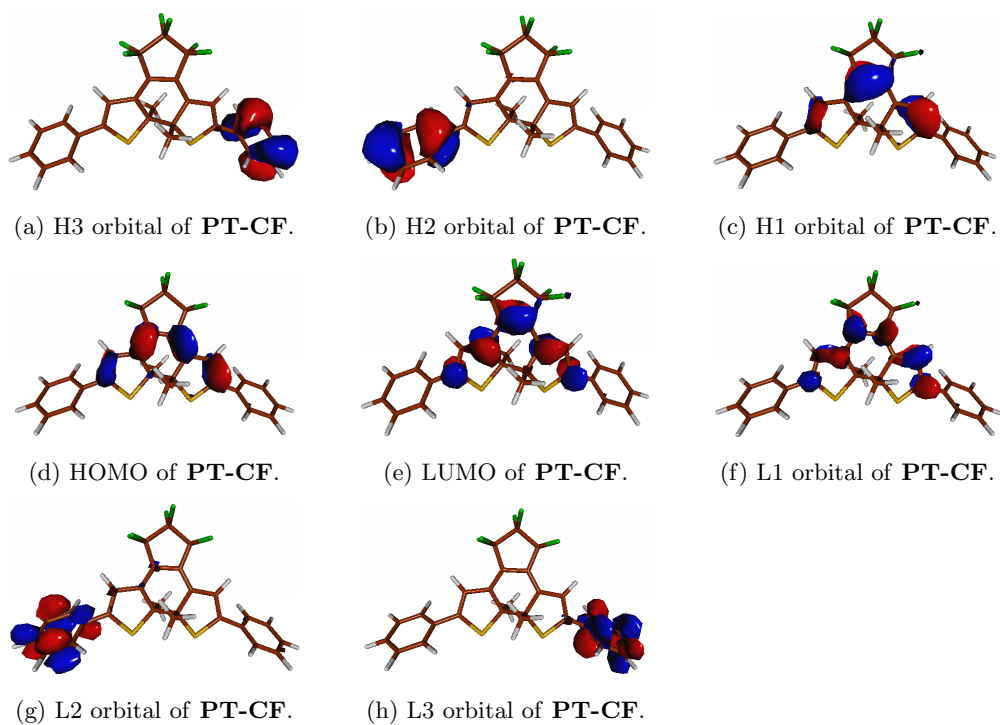

Figure S7: Active space orbitals of **PT-CF** used in QD-NEVPT2 calculations. The averaging was performed over the three lowest singlet states with equal weights.



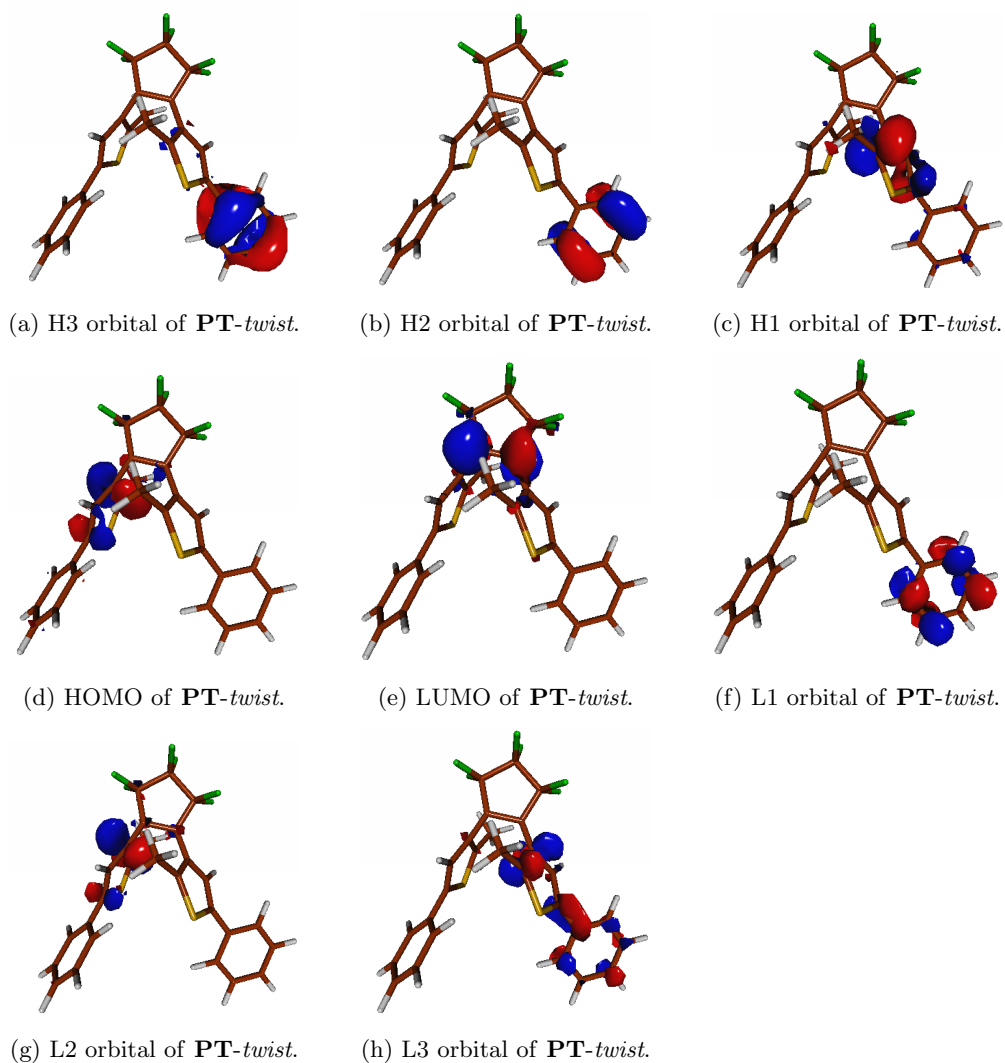

Figure S8: Active space orbitals of **PT-twist** used in QD-NEVPT2 calculations. The averaging was performed over the three lowest singlet states with equal weights.

## S3 DFT benchmark calculations

### S3.1 Geometry optimisations

The two relevant ground-state minima - **PT-OF** and **PT-CF** were reoptimised using DFT, with the  $\omega$ b97XD functional, and the Dunning correlation-consistent double- $\zeta$  basis set. These

calculations confirm the global-minimum character of **PT-OF**, which is stabilised by 0.49 eV with respect to the closed form. The C<sub>1</sub>–C<sub>6</sub> distance takes the value of 1.54 Å for **PT-CF** and 3.50 Å for **PT-OF**. The tiophene dihedral angles are equal to  $\varphi_1 = 49$  and  $\varphi_2 = 50$  degrees for the open-ring isomer, and  $\varphi_1 = 9$  and  $\varphi_2 = 6$  degrees for **PT-CF**.

TD-DFT calculations at the same level of theory predict the first absorption maximum of **PT-OF** at 4.37 eV (271 nm) and 2.72 eV (456 nm) for **PT-CF**. While the predicted  $S_0 \rightarrow S_1$  transition energy is accurate with respect to the experimental data for **PT-OF**, the predicted transition energy of **PT-CF** is off by about 0.6 eV with respect to the experiment, replicating ODM2/MRCI-SD results. TD-DFT predicts the  $S_1$  state of both switching forms to be of HOMO-LUMO character, which agrees with both the QD-NEVPT2 and semi-empirical results.

Optimisations at the DFT level of theory confirm the existence of a ground state **PT-twist** minimum. The tiophene dihedral angles take the values of  $\varphi_1 = 60$  and  $\varphi_2 = 79$  degrees. However, unlike ODM2/MRCI-SD, DFT/ $\omega$ b97XD predicts this structure as higher-energy than **PT-OF**, by 0.28 eV. The relative energies of all optimised DFT minima can be found in table S1.

Excited state optimisation at the TDA TD-DFT/ $\omega$ b97XD level of theory yield an  $S_1$  minimum of **PT-twist** in which the positions of the side tiophene groups are slightly different, with respect to ODM2/MRCI-SD results. The relevant dihedral angles take the values of  $\varphi_1 = 12$  degrees and  $\varphi_2 = 25$  degrees, indicating a situation where both the tiophene rings and the central cyclopentane rings are much more in-plane. However, such behaviour is expected, as the conformation of these side-rings will be influenced mostly by dispersion interactions, which are modelled in a significantly different way in the semi-empirical and DFT calculations. Nevertheless, the overall twisted, and potentially unreactive character of **PT-twist** is maintained.

Table S1: Relative energies of the DFT-optimised minima of **PT**.

| Form                        | Relative energy (eV) |
|-----------------------------|----------------------|
| <b>PT-OF</b>                | 0                    |
| <b>PT-CF</b>                | 0.49                 |
| <b>PT-twist</b> (S0)        | 0.28                 |
| <b>PT-twist</b> (S1)        | 3.95                 |
| <b>MECI-PT</b> product (S0) | 1.04                 |

### S3.2 Cartesian coordinates

Table S2: Cartesian coordinates of **PT-CF**, optimised at the DFT/ $\omega$ b97x-D level of theory, with the cc-pVDZ basis set.

|   |           |           |           |
|---|-----------|-----------|-----------|
| C | 6.327409  | 4.943451  | 0.825962  |
| C | 6.381775  | 3.818623  | -0.009488 |
| C | 7.370627  | 3.757885  | -1.000630 |
| C | 8.271320  | 4.805448  | -1.164704 |
| C | 8.202942  | 5.924200  | -0.336590 |
| C | 7.230705  | 5.988212  | 0.660966  |
| C | 5.394961  | 2.733827  | 0.135942  |
| S | 5.864593  | 1.078409  | -0.280425 |
| C | 4.265581  | 0.403849  | 0.366180  |
| C | 3.360736  | 1.631996  | 0.508929  |
| C | 4.107535  | 2.863183  | 0.540309  |
| C | 3.593686  | -0.607084 | -0.585311 |
| C | 2.197519  | -0.940948 | -0.048595 |
| C | 1.459621  | 0.088280  | 0.420715  |
| C | 2.030519  | 1.416666  | 0.590521  |
| C | 0.930127  | 2.390451  | 0.869325  |
| C | -0.210172 | 1.493626  | 1.424489  |
| C | -0.004695 | 0.120077  | 0.730321  |
| C | 1.874384  | -2.337097 | -0.185037 |
| C | 2.938833  | -3.116843 | -0.497240 |
| S | 4.462456  | -2.238830 | -0.673661 |
| F | -0.757122 | 0.086143  | -0.403742 |
| F | -0.431007 | -0.902159 | 1.511359  |
| F | 0.494105  | 3.009308  | -0.262711 |
| F | 1.260115  | 3.365065  | 1.749013  |
| F | -1.430943 | 2.004853  | 1.216946  |
| F | -0.025398 | 1.342435  | 2.753969  |
| C | 4.519271  | -0.154665 | 1.779665  |
| C | 3.410191  | -0.074649 | -2.019781 |
| C | 2.936365  | -4.583773 | -0.653863 |
| C | 2.134403  | -5.374126 | 0.181372  |
| C | 2.121995  | -6.758187 | 0.041161  |

|   |          |           |           |
|---|----------|-----------|-----------|
| C | 2.909207 | -7.370478 | -0.932991 |
| C | 3.710049 | -6.591731 | -1.766779 |
| C | 3.729411 | -5.207531 | -1.626108 |
| H | 0.871260 | -2.731680 | -0.027824 |
| H | 3.647026 | 3.821877  | 0.774292  |
| H | 1.536458 | -4.895893 | 0.959735  |
| H | 1.500827 | -7.363873 | 0.703975  |
| H | 2.901994 | -8.457079 | -1.039508 |
| H | 4.325899 | -7.066344 | -2.533182 |
| H | 4.350030 | -4.596706 | -2.285556 |
| H | 2.844451 | -0.809201 | -2.609011 |
| H | 2.843488 | 0.868357  | -2.005576 |
| H | 4.378391 | 0.102736  | -2.504465 |
| H | 5.227459 | -0.992473 | 1.753845  |
| H | 3.575992 | -0.505206 | 2.224777  |
| H | 4.931132 | 0.640234  | 2.416001  |
| H | 7.421067 | 2.890410  | -1.662874 |
| H | 9.029647 | 4.746352  | -1.947724 |
| H | 8.912239 | 6.744202  | -0.465214 |
| H | 7.178870 | 6.856414  | 1.320777  |
| H | 5.583693 | 4.988351  | 1.624076  |

Table S3: Cartesian coordinates of **PT-OF**, optimised at the DFT/ $\omega$ b97x-D level of theory, with the cc-pVDZ basis set.

|   |           |          |           |
|---|-----------|----------|-----------|
| C | 2.909611  | 4.710908 | 1.710266  |
| C | 1.550364  | 4.431127 | 1.496424  |
| C | 0.593576  | 5.182195 | 2.197034  |
| C | 0.983851  | 6.181784 | 3.086298  |
| C | 2.337512  | 6.445002 | 3.297942  |
| C | 3.297815  | 5.704046 | 2.607178  |
| C | 1.146530  | 3.355674 | 0.570987  |
| S | -0.364038 | 3.426142 | -0.296773 |
| C | -0.108267 | 1.880212 | -1.042262 |

|   |           |           |           |
|---|-----------|-----------|-----------|
| C | 1.096897  | 1.336825  | -0.639265 |
| C | 1.811352  | 2.197613  | 0.263999  |
| C | 1.621408  | 0.020128  | -1.056284 |
| C | 1.001119  | -1.186794 | -1.046611 |
| C | 1.907138  | -2.268080 | -1.607665 |
| C | 3.097328  | -1.493602 | -2.242288 |
| C | 3.055366  | -0.113504 | -1.529885 |
| C | -0.341702 | -1.525248 | -0.525616 |
| C | -1.314436 | -2.264623 | -1.284633 |
| C | -2.509627 | -2.437753 | -0.637748 |
| S | -2.441949 | -1.723623 | 0.950443  |
| C | -0.813850 | -1.168662 | 0.724670  |
| C | -3.725084 | -3.117016 | -1.125268 |
| C | -3.617452 | -4.231803 | -1.971875 |
| C | -4.758337 | -4.868396 | -2.456404 |
| C | -6.026887 | -4.411322 | -2.095598 |
| C | -6.145404 | -3.309543 | -1.247713 |
| C | -5.005469 | -2.665562 | -0.769004 |
| C | -0.129377 | -0.438442 | 1.838138  |
| F | 3.441966  | 0.883400  | -2.354060 |
| F | 3.922716  | -0.115247 | -0.474226 |
| F | 2.870172  | -1.318599 | -3.561195 |
| F | 4.271284  | -2.125084 | -2.086888 |
| F | 1.287536  | -3.044612 | -2.535651 |
| F | 2.355593  | -3.100409 | -0.635017 |
| C | -1.135081 | 1.345467  | -1.991954 |
| H | -0.678023 | 0.643965  | -2.703336 |
| H | -1.601152 | 2.158092  | -2.567379 |
| H | -1.936887 | 0.808928  | -1.459981 |
| H | -0.352988 | 0.640041  | 1.812182  |
| H | 0.960151  | -0.556045 | 1.764809  |
| H | -0.449049 | -0.822918 | 2.816900  |
| H | -0.469178 | 4.969430  | 2.056949  |
| H | 0.223405  | 6.752230  | 3.623915  |

|   |           |           |           |
|---|-----------|-----------|-----------|
| H | 2.643717  | 7.226322  | 3.996650  |
| H | 4.360002  | 5.906728  | 2.759982  |
| H | 3.668381  | 4.155501  | 1.155215  |
| H | -5.109116 | -1.790197 | -0.122825 |
| H | -7.133272 | -2.941949 | -0.961901 |
| H | -6.920208 | -4.914153 | -2.471948 |
| H | -4.654541 | -5.735638 | -3.112069 |
| H | -2.628605 | -4.613045 | -2.234967 |
| H | 2.772875  | 1.928376  | 0.700988  |
| H | -1.132862 | -2.617379 | -2.298756 |

Table S4: Cartesian coordinates of **PT**-*twist*, optimised at the DFT/ $\omega$ b97x-D level of theory, with the cc-pVDZ basis set, in the ground state.

|   |           |           |           |
|---|-----------|-----------|-----------|
| C | -0.164677 | 5.018172  | 1.168765  |
| C | 0.022506  | 3.628422  | 1.232420  |
| C | -0.282177 | 2.970627  | 2.436171  |
| C | -0.745768 | 3.680871  | 3.541412  |
| C | -0.931032 | 5.062105  | 3.464162  |
| C | -0.642186 | 5.725708  | 2.271466  |
| C | 0.501112  | 2.855573  | 0.069175  |
| S | 0.212003  | 3.386670  | -1.564896 |
| C | 0.960558  | 1.978316  | -2.250382 |
| C | 1.147607  | 1.647278  | 0.057012  |
| C | 1.411316  | 1.130666  | -1.257489 |
| C | 2.015338  | -0.212090 | -1.470179 |
| C | 1.528078  | -1.377395 | -0.987191 |
| C | 2.367284  | -2.564563 | -1.401983 |
| C | 3.598398  | -1.961921 | -2.154984 |
| C | 3.341111  | -0.416093 | -2.177689 |
| C | 0.283403  | -1.555243 | -0.190389 |
| C | -1.032533 | -1.516482 | -0.765976 |
| C | -2.039980 | -1.616936 | 0.156230  |
| S | -1.377666 | -1.786429 | 1.759130  |

|   |           |           |           |
|---|-----------|-----------|-----------|
| C | 0.258490  | -1.709695 | 1.178791  |
| C | -3.503061 | -1.586634 | -0.069132 |
| C | -4.099599 | -2.462648 | -0.988473 |
| C | -5.474550 | -2.418919 | -1.219492 |
| C | -6.274075 | -1.502825 | -0.534854 |
| C | -5.690695 | -0.630621 | 0.385523  |
| C | -4.316730 | -0.672919 | 0.618673  |
| C | 1.404186  | -1.779874 | 2.142664  |
| F | 3.337244  | 0.038592  | -3.457691 |
| F | 4.336711  | 0.239126  | -1.533574 |
| F | 3.686251  | -2.450236 | -3.405029 |
| F | 4.739745  | -2.244889 | -1.501589 |
| F | 1.667283  | -3.393627 | -2.215728 |
| F | 2.772988  | -3.307281 | -0.339966 |
| C | 0.988068  | 1.827888  | -3.741566 |
| H | 0.074053  | 2.239504  | -4.192392 |
| H | 1.066269  | 0.771555  | -4.026317 |
| H | 1.848117  | 2.353940  | -4.183189 |
| H | 2.358924  | -1.755726 | 1.602939  |
| H | 1.378476  | -2.710076 | 2.729290  |
| H | 1.385696  | -0.941993 | 2.857026  |
| H | -0.181096 | 1.885338  | 2.497987  |
| H | -0.978760 | 3.147392  | 4.465801  |
| H | -1.304093 | 5.616795  | 4.327835  |
| H | -0.785990 | 6.805820  | 2.198176  |
| H | 0.072721  | 5.554965  | 0.246825  |
| H | -3.861901 | 0.025208  | 1.325331  |
| H | -6.307318 | 0.095015  | 0.920509  |
| H | -7.350439 | -1.469026 | -0.717416 |
| H | -5.924985 | -3.111843 | -1.933562 |
| H | -3.480200 | -3.194143 | -1.511945 |
| H | 1.455053  | 1.132967  | 0.966729  |
| H | -1.217871 | -1.386080 | -1.832434 |

Table S5: Cartesian coordinates of **PT**-*twist*, optimised at the TDA TD-DFT/B3LYP level of theory, with the cc-pVDZ basis set, in the  $S_1$  state.

|   |           |           |           |
|---|-----------|-----------|-----------|
| C | -0.818801 | 4.666525  | 0.501231  |
| C | -0.655355 | 3.272740  | 0.530231  |
| C | -1.259208 | 2.544148  | 1.569793  |
| C | -1.995536 | 3.195053  | 2.553824  |
| C | -2.149216 | 4.580236  | 2.516712  |
| C | -1.559687 | 5.312095  | 1.485087  |
| C | 0.113348  | 2.559363  | -0.494920 |
| S | 0.264761  | 3.164754  | -2.130223 |
| C | 1.155093  | 1.808063  | -2.661186 |
| C | 0.745126  | 1.356139  | -0.387916 |
| C | 1.316186  | 0.855131  | -1.618097 |
| C | 1.882559  | -0.455334 | -1.711361 |
| C | 1.780962  | -1.434915 | -0.668197 |
| C | 2.982721  | -2.310771 | -0.704251 |
| C | 3.440190  | -2.242572 | -2.182700 |
| C | 2.901134  | -0.882072 | -2.711881 |
| C | 0.626091  | -1.647009 | 0.139555  |
| C | -0.689933 | -1.200723 | -0.261583 |
| C | -1.656432 | -1.362477 | 0.684745  |
| S | -0.974802 | -2.114863 | 2.115085  |
| C | 0.595661  | -2.195921 | 1.446964  |
| C | -3.060140 | -0.934726 | 0.641473  |
| C | -3.410413 | 0.202630  | -0.104961 |
| C | -4.732879 | 0.630067  | -0.161035 |
| C | -5.725691 | -0.063452 | 0.529778  |
| C | -5.386654 | -1.190072 | 1.279396  |
| C | -4.066372 | -1.624033 | 1.335192  |
| C | 1.737587  | -2.707308 | 2.256234  |
| F | 2.414384  | -1.064188 | -3.983256 |
| F | 3.930378  | 0.007806  | -2.850751 |
| F | 2.859020  | -3.255089 | -2.858819 |
| F | 4.770969  | -2.351529 | -2.325799 |



|   |           |           |           |
|---|-----------|-----------|-----------|
| F | 2.754455  | -3.599841 | -0.337843 |
| F | 4.015492  | -1.870500 | 0.094109  |
| C | 1.594993  | 1.729726  | -4.082783 |
| H | 1.293369  | 2.623098  | -4.644754 |
| H | 1.170901  | 0.839036  | -4.570155 |
| H | 2.688843  | 1.626473  | -4.140651 |
| H | 2.630840  | -2.090190 | 2.076193  |
| H | 2.001977  | -3.733871 | 1.959002  |
| H | 1.505431  | -2.702527 | 3.329718  |
| H | -1.169640 | 1.455505  | 1.589935  |
| H | -2.464600 | 2.610662  | 3.347944  |
| H | -2.731047 | 5.089116  | 3.287750  |
| H | -1.673476 | 6.397392  | 1.449531  |
| H | -0.346766 | 5.252122  | -0.292101 |
| H | -3.813345 | -2.518798 | 1.909910  |
| H | -6.159382 | -1.739870 | 1.820480  |
| H | -6.762870 | 0.274920  | 0.487818  |
| H | -4.986468 | 1.520411  | -0.739823 |
| H | -2.631852 | 0.767282  | -0.623415 |
| H | 0.846376  | 0.830797  | 0.559356  |
| H | -0.886668 | -0.796329 | -1.254049 |

Table S6: Cartesian coordinates of the alternative photoproduct of **PT** cyclization, formed via the proton transfer **MECI**, optimised at the DFT/ $\omega$ b97x-D level of theory, with the cc-pVDZ basis set.

|   |           |          |           |          |
|---|-----------|----------|-----------|----------|
| C | 2.563371  | 5.107970 | 1.042316  | 0.000000 |
| C | 1.295515  | 4.522007 | 1.181667  | 0.000000 |
| C | 0.385799  | 5.087658 | 2.088705  | 0.000000 |
| C | 0.739460  | 6.201015 | 2.847884  | 0.000000 |
| C | 2.004580  | 6.771849 | 2.706801  | 0.000000 |
| C | 2.913419  | 6.222969 | 1.800128  | 0.000000 |
| C | 0.928001  | 3.335645 | 0.386813  | 0.000000 |
| S | -0.773926 | 3.066661 | -0.011197 | 0.000000 |

|   |           |           |           |          |
|---|-----------|-----------|-----------|----------|
| C | -0.342794 | 1.634994  | -0.982153 | 0.000000 |
| C | 1.076663  | 1.254048  | -0.745746 | 0.000000 |
| C | 1.752382  | 2.364764  | -0.079244 | 0.000000 |
| C | 1.659629  | 0.057194  | -1.038035 | 0.000000 |
| C | 0.995471  | -1.249509 | -1.494625 | 0.000000 |
| C | 2.151662  | -2.274003 | -1.512563 | 0.000000 |
| C | 3.413608  | -1.427108 | -1.793114 | 0.000000 |
| C | 3.160976  | -0.134325 | -0.974381 | 0.000000 |
| C | -0.256358 | -1.705594 | -0.756402 | 0.000000 |
| C | -1.451838 | -2.052211 | -1.472369 | 0.000000 |
| C | -2.528655 | -2.346946 | -0.676502 | 0.000000 |
| S | -2.062314 | -2.248614 | 0.997828  | 0.000000 |
| C | -0.432820 | -1.778507 | 0.608838  | 0.000000 |
| C | -3.915620 | -2.640172 | -1.087469 | 0.000000 |
| C | -4.177748 | -3.237941 | -2.331212 | 0.000000 |
| C | -5.486836 | -3.462166 | -2.753390 | 0.000000 |
| C | -6.562070 | -3.108403 | -1.936580 | 0.000000 |
| C | -6.314563 | -2.527869 | -0.692401 | 0.000000 |
| C | -5.005798 | -2.292372 | -0.273294 | 0.000000 |
| C | 0.524983  | -1.531735 | 1.735040  | 0.000000 |
| F | 3.874998  | 0.902025  | -1.483342 | 0.000000 |
| F | 3.624646  | -0.324313 | 0.301456  | 0.000000 |
| F | 3.434080  | -1.107874 | -3.110956 | 0.000000 |
| F | 4.560519  | -2.045828 | -1.480064 | 0.000000 |
| F | 1.971607  | -3.231775 | -2.449159 | 0.000000 |
| F | 2.313194  | -2.895677 | -0.317610 | 0.000000 |
| C | -1.187441 | 1.157019  | -1.905317 | 0.000000 |
| H | 0.726187  | -1.160918 | -2.562087 | 0.000000 |
| H | -0.907327 | 0.339497  | -2.564562 | 0.000000 |
| H | -2.177338 | 1.594382  | -2.045838 | 0.000000 |
| H | 0.724082  | -2.461277 | 2.290056  | 0.000000 |
| H | 0.119480  | -0.796518 | 2.446605  | 0.000000 |
| H | 1.485072  | -1.157300 | 1.364877  | 0.000000 |
| H | -0.604203 | 4.641854  | 2.213693  | 0.000000 |

|   |           |           |           |          |
|---|-----------|-----------|-----------|----------|
| H | 0.022108  | 6.623928  | 3.554223  | 0.000000 |
| H | 2.280692  | 7.647076  | 3.298607  | 0.000000 |
| H | 3.901118  | 6.671328  | 1.675036  | 0.000000 |
| H | 3.270306  | 4.698473  | 0.318127  | 0.000000 |
| H | -4.827190 | -1.811338 | 0.691582  | 0.000000 |
| H | -7.148006 | -2.244270 | -0.045763 | 0.000000 |
| H | -7.587565 | -3.286776 | -2.267125 | 0.000000 |
| H | -5.667805 | -3.924872 | -3.726116 | 0.000000 |
| H | -3.344899 | -3.542605 | -2.968369 | 0.000000 |
| H | 2.819397  | 2.352238  | 0.131534  | 0.000000 |
| H | -1.518352 | -2.036019 | -2.562018 | 0.000000 |

## S4 Ground-state population fitting

To obtain the timescales of **PT-OF** photo-cyclization the ground-state population data was fitted with a double sigmoid function:

$$P(t) = \frac{A}{1 + e^{-B(t-\tau_1)}} + \frac{C}{1 + e^{-D(t-\tau_2)}}. \quad (\text{S1})$$

The timescales are denoted as  $\tau_1$  and  $\tau_2$ , while A and C measures the portion of trajectories relaxing on each timescale. The parameters B and D can be interpreted as the steepness of the growth curve on each timescale. Fit parameters for **PT-OF** dynamics can be seen in table S1, and the fitted function, along with the simulation data, in figure S9.

Table S7: Parameters of the function  $P(t)$  fitted to the  $S_0$  population rise in **PT-OF** dynamics.

|           |                                      |
|-----------|--------------------------------------|
| Parameter |                                      |
| A         | $0,5315 \pm 0,0052$                  |
| B         | $(0,01815 \pm 0.00021) \text{ 1/fs}$ |
| C         | $0,4107 \pm 0,0055$                  |
| D         | $(0,00583 \pm 0.00001) \text{ 1/fs}$ |
| $\tau_1$  | $(342,06 \pm 0,52) \text{ fs}$       |
| $\tau_2$  | $(766,3 \pm 4,8) \text{ fs}$         |

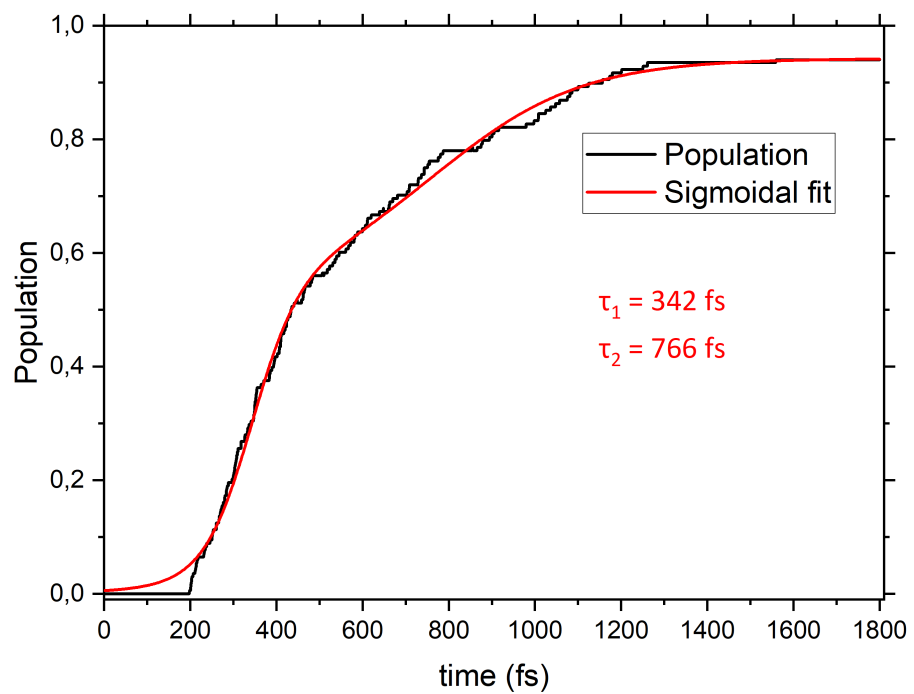

Figure S9: Ground state population rise, and the fitted double sigmoid function in **PT-OF** dynamics.

## S5 Dynamic sampling procedure

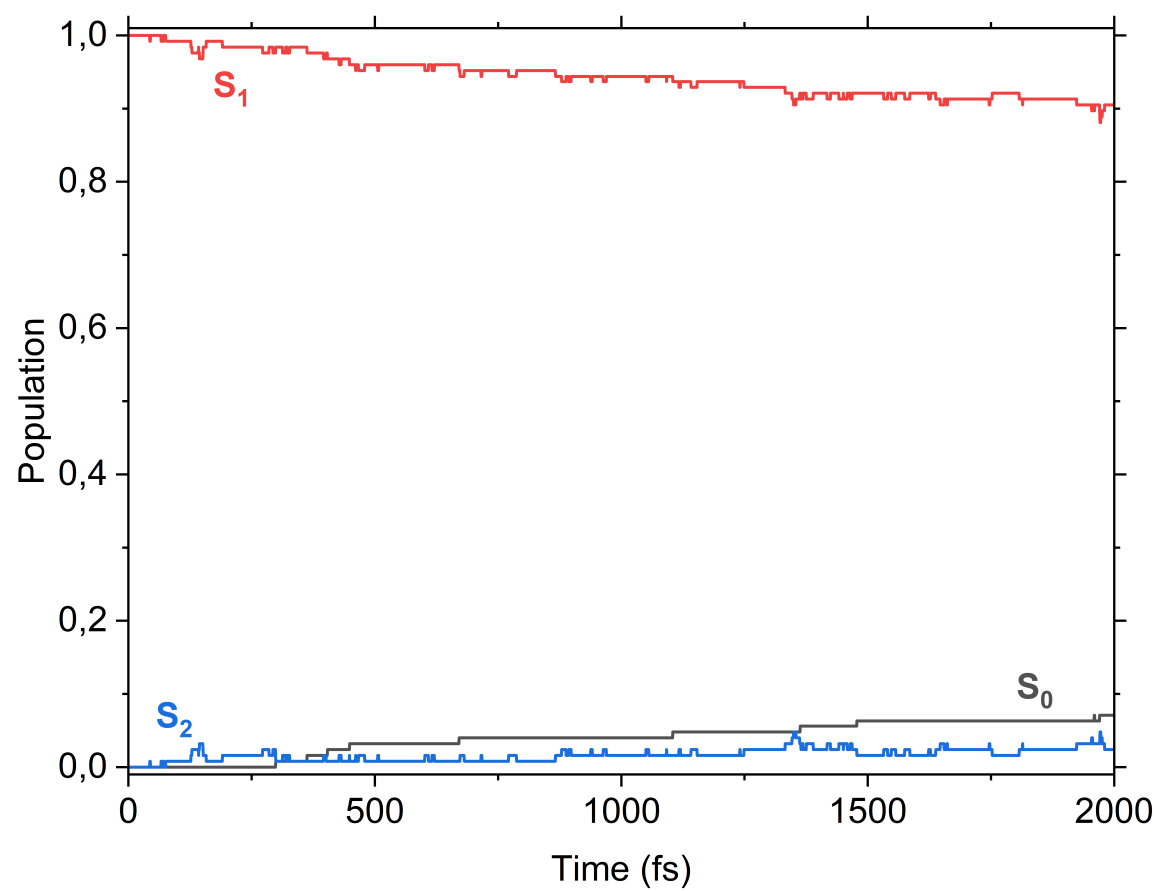

Figure S10: Electronic state population evolution in the photo-cyclization dynamics of **PT-twist**. The states  $S_0$ ,  $S_1$  and  $S_2$  have been marked respectively in black, red, and blue.

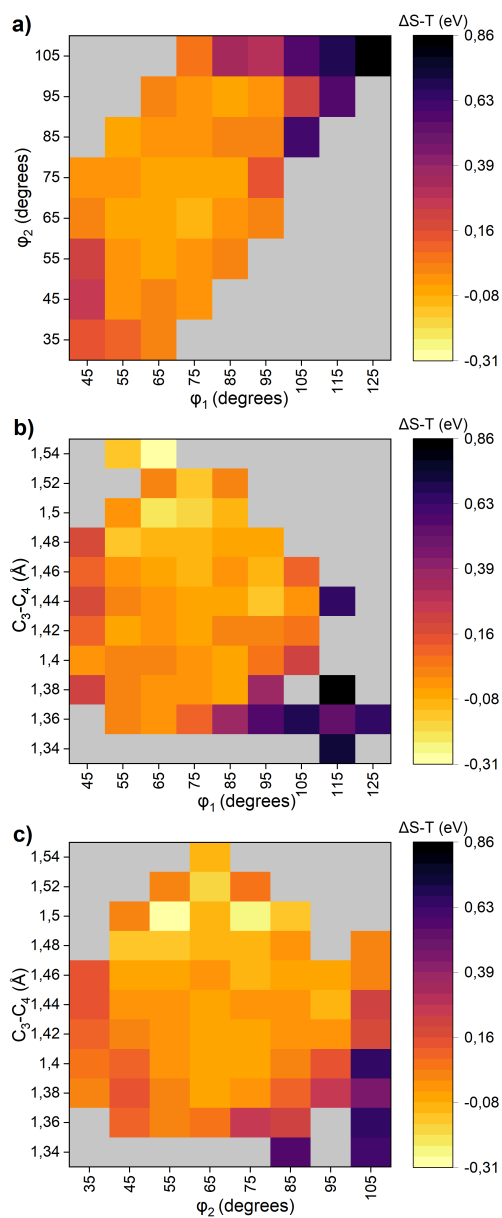

Figure S11: Heatmaps displaying the magnitude of the energy gap between  $S_1$  and  $T_1$  parametrized by geometric parameters of **PT-OF**; (a) dihedral angles  $\varphi_1$  and  $\varphi_2$ ; (b) dihedral angle  $\varphi_1$  and the  $C_3-C_4$  distance; (c) dihedral angle  $\varphi_2$  and the  $C_3-C_4$  distance.

## S6 Solvent shifts

Table S8: Electronic transition energies of the studied **PT** forms computed at the ODM2/MRCI-SD level of theory, with the environment accounted for under the conductor-like screening model (COSMO), for several solvents commonly used in DAE experimental studies.

| Molecule                 | Gas phase | Cyclohexane | Chloroform | Acetonitrile |
|--------------------------|-----------|-------------|------------|--------------|
| $S_0 \rightarrow S_1$    |           |             |            |              |
| <b>PT-OF</b>             | 4.11      | 4.02        | 3.95       | 3.88         |
| <b>PT-CF</b>             | 2.77      | 2.78        | 2.78       | 2.79         |
| <b>PT-twist (S0-opt)</b> | 4.90      | 4.46        | 4.35       | 4.16         |
| <b>PT-twist (S1-opt)</b> | 2.15      | 1.88        | 1.64       | 1.43         |
| $S_0 \rightarrow T_1$    |           |             |            |              |
| <b>PT-twist (S1-opt)</b> | 2.04      | 1.80        | 1.58       | 1.37         |

## S7 Cartesian coordinates of key forms of PT optimised at the ODM2/MRCI-SD level

Table S9: Cartesian coordinates of **PT-CF**.

|   |          |           |           |
|---|----------|-----------|-----------|
| C | 6.616614 | 4.620270  | 1.113910  |
| C | 6.389554 | 3.798816  | -0.001449 |
| C | 7.067057 | 4.023255  | -1.210042 |
| C | 7.971767 | 5.071965  | -1.293007 |
| C | 8.205636 | 5.893344  | -0.186085 |
| C | 7.525484 | 5.663553  | 1.013491  |
| C | 5.405806 | 2.715413  | 0.106516  |
| S | 5.921121 | 1.043370  | -0.164388 |
| C | 4.306433 | 0.397603  | 0.372145  |
| C | 3.377673 | 1.617978  | 0.454146  |
| C | 4.087626 | 2.866780  | 0.439365  |
| C | 3.679094 | -0.623622 | -0.598377 |
| C | 2.261749 | -0.943546 | -0.093250 |
| C | 1.488737 | 0.067774  | 0.370533  |

|   |           |           |           |
|---|-----------|-----------|-----------|
| C | 2.036539  | 1.411003  | 0.518044  |
| C | 0.944719  | 2.401639  | 0.746065  |
| C | -0.353971 | 1.558191  | 0.957192  |
| C | 0.038829  | 0.055330  | 0.747411  |
| C | 1.933369  | -2.342092 | -0.196082 |
| C | 3.020489  | -3.121571 | -0.480022 |
| S | 4.544645  | -2.229285 | -0.649666 |
| F | -0.750532 | -0.537738 | -0.190005 |
| F | -0.212223 | -0.684893 | 1.865090  |
| F | 0.804560  | 3.302069  | -0.270784 |
| F | 1.183657  | 3.201070  | 1.822744  |
| F | -1.332346 | 1.936777  | 0.101136  |
| F | -0.882902 | 1.770813  | 2.186387  |
| C | 4.412723  | -0.148181 | 1.804727  |
| C | 3.512119  | -0.063501 | -2.018337 |
| C | 2.991339  | -4.588203 | -0.602396 |
| C | 2.593429  | -5.345755 | 0.499111  |
| C | 2.535029  | -6.732289 | 0.375330  |
| C | 2.866846  | -7.343922 | -0.828739 |
| C | 3.267362  | -6.575438 | -1.916576 |
| C | 3.338006  | -5.188481 | -1.811422 |
| H | 0.939706  | -2.726406 | -0.032012 |
| H | 3.613541  | 3.816930  | 0.627504  |
| H | 2.338815  | -4.858908 | 1.445039  |
| H | 2.217500  | -7.339734 | 1.229304  |
| H | 2.815329  | -8.432594 | -0.919595 |
| H | 3.534316  | -7.059713 | -2.863107 |
| H | 3.651775  | -4.579521 | -2.663461 |
| H | 2.887476  | -0.740526 | -2.613649 |
| H | 3.014509  | 0.913601  | -1.973332 |
| H | 4.478310  | 0.052286  | -2.517065 |
| H | 5.175657  | -0.926704 | 1.878599  |
| H | 3.445809  | -0.567168 | 2.108202  |
| H | 4.669259  | 0.664714  | 2.495548  |



|   |          |          |           |
|---|----------|----------|-----------|
| H | 6.882150 | 3.376580 | -2.070121 |
| H | 8.509520 | 5.254282 | -2.228330 |
| H | 8.923433 | 6.715890 | -0.257989 |
| H | 7.711077 | 6.308945 | 1.877477  |
| H | 6.086808 | 4.427915 | 2.050303  |

Table S10: Cartesian coordinates of **PT-OF**.

|   |           |           |           |
|---|-----------|-----------|-----------|
| C | 2.516248  | 4.887625  | 1.485273  |
| C | 1.254613  | 4.285051  | 1.479589  |
| C | 0.248532  | 4.721983  | 2.348295  |
| C | 0.508151  | 5.780253  | 3.212589  |
| C | 1.756518  | 6.398216  | 3.210954  |
| C | 2.757781  | 5.948830  | 2.353751  |
| C | 0.999393  | 3.177855  | 0.552155  |
| S | -0.478960 | 3.156667  | -0.396055 |
| C | -0.033192 | 1.626145  | -1.107797 |
| C | 1.198781  | 1.176434  | -0.618773 |
| C | 1.800199  | 2.077737  | 0.314611  |
| C | 1.770630  | -0.075964 | -1.049471 |
| C | 1.143881  | -1.280070 | -1.077230 |
| C | 2.004148  | -2.344172 | -1.739211 |
| C | 3.294583  | -1.596997 | -2.216653 |
| C | 3.197317  | -0.175529 | -1.567218 |
| C | -0.168498 | -1.582183 | -0.543852 |
| C | -1.228450 | -2.170345 | -1.304499 |
| C | -2.386999 | -2.294189 | -0.563794 |
| S | -2.188300 | -1.747171 | 1.089176  |
| C | -0.533825 | -1.286041 | 0.767864  |
| C | -3.683361 | -2.798083 | -1.030286 |
| C | -3.729959 | -3.976935 | -1.784559 |
| C | -4.963312 | -4.468389 | -2.198077 |
| C | -6.134911 | -3.791580 | -1.875930 |
| C | -6.078006 | -2.606472 | -1.142564 |

|   |           |           |           |
|---|-----------|-----------|-----------|
| C | -4.854925 | -2.105701 | -0.715624 |
| C | 0.319531  | -0.682981 | 1.822527  |
| F | 3.521457  | 0.810785  | -2.436473 |
| F | 4.103170  | -0.030661 | -0.559705 |
| F | 3.347914  | -1.511590 | -3.568641 |
| F | 4.427773  | -2.251199 | -1.871482 |
| F | 1.363758  | -2.961661 | -2.768803 |
| F | 2.316219  | -3.362955 | -0.898291 |
| C | -0.883329 | 0.963676  | -2.126926 |
| H | -0.267477 | 0.277982  | -2.727661 |
| H | -1.347973 | 1.695872  | -2.800679 |
| H | -1.670711 | 0.386120  | -1.621492 |
| H | 0.170080  | 0.407440  | 1.821526  |
| H | 1.375454  | -0.899251 | 1.603048  |
| H | 0.072300  | -1.083766 | 2.814816  |
| H | -0.731825 | 4.240158  | 2.349213  |
| H | -0.273970 | 6.132522  | 3.892224  |
| H | 1.953629  | 7.236026  | 3.887239  |
| H | 3.739456  | 6.433509  | 2.357418  |
| H | 3.295352  | 4.539351  | 0.801542  |
| H | -4.812227 | -1.181743 | -0.133295 |
| H | -7.003312 | -2.075192 | -0.898251 |
| H | -7.102769 | -4.187050 | -2.198000 |
| H | -5.012016 | -5.400243 | -2.772381 |
| H | -2.808022 | -4.512555 | -2.023800 |
| H | 2.748302  | 1.902674  | 0.802035  |
| H | -1.144018 | -2.451359 | -2.344445 |

Table S11: Cartesian coordinates of **PT-twist**, at the  $S_1$  local minimum.

|   |           |          |          |
|---|-----------|----------|----------|
| C | -0.346727 | 4.845187 | 1.180672 |
| C | -0.047951 | 3.483530 | 1.282668 |
| C | -0.201030 | 2.785230 | 2.487874 |
| C | -0.700182 | 3.465439 | 3.590466 |

|   |           |           |           |
|---|-----------|-----------|-----------|
| C | -1.013802 | 4.820213  | 3.499141  |
| C | -0.824049 | 5.510303  | 2.304863  |
| C | 0.479217  | 2.735723  | 0.144463  |
| S | -0.152982 | 2.915294  | -1.501832 |
| C | 0.937626  | 1.686643  | -2.047426 |
| C | 1.742796  | 1.093235  | -0.947549 |
| C | 1.473684  | 1.779501  | 0.253608  |
| C | 2.356896  | -0.183712 | -1.087118 |
| C | 1.400007  | -1.233022 | -1.274071 |
| C | 2.053431  | -2.393516 | -1.919624 |
| C | 3.530038  | -1.961046 | -2.224378 |
| C | 3.627160  | -0.467450 | -1.773441 |
| C | 0.214641  | -1.296011 | -0.443274 |
| C | -1.123102 | -1.394406 | -0.947272 |
| C | -2.075320 | -1.289084 | 0.048122  |
| S | -1.370513 | -1.092266 | 1.642780  |
| C | 0.235813  | -1.141404 | 0.941284  |
| C | -3.532310 | -1.364002 | -0.109902 |
| C | -4.066964 | -2.451114 | -0.809084 |
| C | -5.445420 | -2.562502 | -0.951941 |
| C | -6.284325 | -1.595082 | -0.406396 |
| C | -5.746453 | -0.504458 | 0.270518  |
| C | -4.368118 | -0.377459 | 0.419004  |
| C | 1.450962  | -1.125741 | 1.791673  |
| F | 3.916268  | 0.379321  | -2.828658 |
| F | 4.707250  | -0.236655 | -0.960115 |
| F | 3.852143  | -2.107771 | -3.537839 |
| F | 4.435853  | -2.742720 | -1.582583 |
| F | 1.426853  | -2.735181 | -3.100282 |
| F | 1.997669  | -3.576512 | -1.236404 |
| C | 1.044536  | 1.211564  | -3.434846 |
| H | 0.361332  | 1.720054  | -4.120465 |
| H | 0.836072  | 0.134934  | -3.425484 |
| H | 2.082512  | 1.352716  | -3.757621 |

|   |           |           |           |
|---|-----------|-----------|-----------|
| H | 2.332246  | -1.067375 | 1.142954  |
| H | 1.494107  | -2.052728 | 2.383770  |
| H | 1.445413  | -0.264164 | 2.484748  |
| H | 0.021884  | 1.717534  | 2.547755  |
| H | -0.850497 | 2.933223  | 4.532199  |
| H | -1.424079 | 5.336288  | 4.373119  |
| H | -1.060182 | 6.574891  | 2.246084  |
| H | -0.198760 | 5.384253  | 0.242852  |
| H | -3.938942 | 0.479422  | 0.947695  |
| H | -6.413488 | 0.253703  | 0.694799  |
| H | -7.369476 | -1.692572 | -0.507464 |
| H | -5.872913 | -3.418055 | -1.484062 |
| H | -3.400473 | -3.213585 | -1.219841 |
| H | 1.985165  | 1.563909  | 1.172753  |
| H | -1.361905 | -1.540209 | -1.992358 |

Table S12: Cartesian coordinates of **PT-twist**, at the  $S_0$  local minimum.

|   |           |           |           |
|---|-----------|-----------|-----------|
| C | -0.140028 | 4.924989  | 1.269332  |
| C | -0.019390 | 3.529644  | 1.274969  |
| C | -0.347593 | 2.798391  | 2.423389  |
| C | -0.779531 | 3.468773  | 3.563565  |
| C | -0.894055 | 4.856484  | 3.564661  |
| C | -0.577381 | 5.579038  | 2.417853  |
| C | 0.464575  | 2.792262  | 0.104260  |
| S | 0.204497  | 3.368960  | -1.533170 |
| C | 1.003961  | 1.957376  | -2.184787 |
| C | 1.454522  | 1.109631  | -1.179807 |
| C | 1.134653  | 1.582470  | 0.129275  |
| C | 2.056667  | -0.189877 | -1.423279 |
| C | 1.495811  | -1.366942 | -1.062189 |
| C | 2.326894  | -2.557169 | -1.496682 |
| C | 3.576174  | -1.947460 | -2.217091 |
| C | 3.392630  | -0.393675 | -2.115012 |

|   |           |           |           |
|---|-----------|-----------|-----------|
| C | 0.255751  | -1.511241 | -0.313298 |
| C | -1.047594 | -1.526318 | -0.899965 |
| C | -2.043938 | -1.523671 | 0.058948  |
| S | -1.409816 | -1.566353 | 1.689495  |
| C | 0.230700  | -1.539398 | 1.077395  |
| C | -3.494971 | -1.485663 | -0.185386 |
| C | -4.073320 | -2.450112 | -1.019165 |
| C | -5.440184 | -2.396535 | -1.278115 |
| C | -6.226114 | -1.391595 | -0.713592 |
| C | -5.642705 | -0.437250 | 0.118806  |
| C | -4.277681 | -0.477671 | 0.390394  |
| C | 1.403850  | -1.603982 | 1.990150  |
| F | 3.480501  | 0.210520  | -3.328891 |
| F | 4.413891  | 0.166947  | -1.414154 |
| F | 3.661898  | -2.362157 | -3.504403 |
| F | 4.735075  | -2.360294 | -1.649015 |
| F | 1.647225  | -3.406202 | -2.311618 |
| F | 2.688413  | -3.341715 | -0.444868 |
| C | 1.160217  | 1.754903  | -3.647583 |
| H | 0.401261  | 2.308000  | -4.218843 |
| H | 1.067062  | 0.679571  | -3.875027 |
| H | 2.162179  | 2.102776  | -3.946396 |
| H | 2.330078  | -1.554737 | 1.398812  |
| H | 1.386092  | -2.551125 | 2.546905  |
| H | 1.384928  | -0.764627 | 2.702010  |
| H | -0.277855 | 1.706895  | 2.422811  |
| H | -1.039247 | 2.899747  | 4.461859  |
| H | -1.235139 | 5.377096  | 4.465788  |
| H | -0.669969 | 6.670703  | 2.416560  |
| H | 0.115836  | 5.500773  | 0.377107  |
| H | -3.819426 | 0.275908  | 1.034783  |
| H | -6.264529 | 0.352236  | 0.554774  |
| H | -7.301960 | -1.356162 | -0.918341 |
| H | -5.901023 | -3.151799 | -1.922376 |

|   |           |           |           |
|---|-----------|-----------|-----------|
| H | -3.456111 | -3.243454 | -1.449248 |
| H | 1.410453  | 1.057055  | 1.034706  |
| H | -1.234335 | -1.503640 | -1.965280 |

Table S13: Cartesian coordinates of **PT** CC-MECl.

|   |           |           |           |
|---|-----------|-----------|-----------|
| C | 0.843636  | 5.476272  | 1.491310  |
| C | 1.410697  | 4.201454  | 1.590973  |
| C | 2.338566  | 3.915262  | 2.601724  |
| C | 2.695932  | 4.909843  | 3.504914  |
| C | 2.132596  | 6.180061  | 3.409975  |
| C | 1.207618  | 6.458976  | 2.405450  |
| C | 1.092543  | 3.139442  | 0.636460  |
| S | -0.565574 | 2.930485  | 0.022859  |
| C | -0.111013 | 1.488354  | -0.872147 |
| C | 1.340505  | 1.259233  | -0.757122 |
| C | 1.974840  | 2.262556  | 0.076717  |
| C | 1.840295  | -0.003126 | -1.002680 |
| C | 1.059892  | -1.163710 | -1.114672 |
| C | 1.760393  | -2.264582 | -1.792173 |
| C | 3.237883  | -1.773170 | -1.963710 |
| C | 3.293862  | -0.346674 | -1.317527 |
| C | -0.305202 | -1.144014 | -0.702915 |
| C | -1.278615 | -2.033955 | -1.213384 |
| C | -2.558970 | -1.716974 | -0.748044 |
| S | -2.626511 | -0.329970 | 0.280049  |
| C | -0.826531 | -0.041456 | 0.126786  |
| C | -3.763882 | -2.460547 | -1.131561 |
| C | -3.670769 | -3.851600 | -1.233301 |
| C | -4.796835 | -4.583186 | -1.597942 |
| C | -5.996389 | -3.930046 | -1.869784 |
| C | -6.079665 | -2.545325 | -1.772295 |
| C | -4.967049 | -1.797970 | -1.396971 |
| C | -0.174409 | -0.038971 | 1.501607  |

|   |           |           |           |
|---|-----------|-----------|-----------|
| F | 3.891589  | 0.563458  | -2.127294 |
| F | 4.066341  | -0.332543 | -0.196724 |
| F | 3.609222  | -1.722578 | -3.267131 |
| F | 4.134092  | -2.616617 | -1.395775 |
| F | 1.219337  | -2.631909 | -3.005229 |
| F | 1.707755  | -3.453270 | -1.115765 |
| C | -0.797589 | 1.265072  | -2.194025 |
| H | -1.886906 | 1.315782  | -2.116048 |
| H | -0.505252 | 0.302600  | -2.626098 |
| H | -0.450796 | 2.063783  | -2.866359 |
| H | -0.318799 | -0.990967 | 2.037900  |
| H | -0.591141 | 0.777466  | 2.101977  |
| H | 0.903445  | 0.121976  | 1.378397  |
| H | 2.770856  | 2.913584  | 2.682056  |
| H | 3.418712  | 4.691399  | 4.298522  |
| H | 2.414206  | 6.958865  | 4.125395  |
| H | 0.765831  | 7.458633  | 2.334346  |
| H | 0.123248  | 5.702011  | 0.701774  |
| H | -5.032500 | -0.710498 | -1.327917 |
| H | -7.024078 | -2.037309 | -1.987158 |
| H | -6.878021 | -4.510172 | -2.159742 |
| H | -4.736266 | -5.671778 | -1.670714 |
| H | -2.731716 | -4.362432 | -1.005137 |
| H | 3.034553  | 2.233073  | 0.301882  |
| H | -1.067742 | -2.875528 | -1.851250 |

Table S14: Cartesian coordinates of **PT** PT-MECl.

|   |          |          |          |
|---|----------|----------|----------|
| C | 1.410176 | 5.823534 | 1.125248 |
| C | 1.530696 | 4.461552 | 1.422533 |
| C | 1.883893 | 4.035584 | 2.710083 |
| C | 2.122583 | 4.984694 | 3.697826 |
| C | 2.012976 | 6.343128 | 3.406924 |
| C | 1.656187 | 6.758741 | 2.125309 |

|   |           |           |           |
|---|-----------|-----------|-----------|
| C | 1.331517  | 3.437340  | 0.394937  |
| S | -0.009838 | 3.554805  | -0.770890 |
| C | 0.441764  | 2.050103  | -1.523210 |
| C | 1.561102  | 1.433213  | -0.775215 |
| C | 2.109794  | 2.323319  | 0.213987  |
| C | 1.723230  | 0.071184  | -0.909407 |
| C | 0.731371  | -0.761324 | -1.589169 |
| C | 1.517153  | -1.966358 | -2.080134 |
| C | 2.996224  | -1.897440 | -1.550653 |
| C | 3.058463  | -0.635992 | -0.637989 |
| C | -0.424495 | -1.203388 | -0.748704 |
| C | -1.523954 | -1.850357 | -1.400034 |
| C | -2.556131 | -2.147064 | -0.532339 |
| S | -2.218795 | -1.627318 | 1.105520  |
| C | -0.647774 | -1.018562 | 0.608186  |
| C | -3.809149 | -2.814101 | -0.897842 |
| C | -3.747381 | -3.888531 | -1.792022 |
| C | -4.926042 | -4.503965 | -2.202709 |
| C | -6.154412 | -4.054319 | -1.725858 |
| C | -6.208648 | -2.990543 | -0.828981 |
| C | -5.038998 | -2.363860 | -0.408918 |
| C | 0.228311  | -0.361200 | 1.608294  |
| F | 4.120224  | 0.173198  | -0.895849 |
| F | 3.222048  | -0.955335 | 0.672576  |
| F | 3.916227  | -1.793762 | -2.540905 |
| F | 3.368532  | -3.003626 | -0.862570 |
| F | 1.554747  | -2.000481 | -3.449708 |
| F | 0.998779  | -3.188424 | -1.779705 |
| C | -0.063554 | 1.409588  | -2.683546 |
| H | 0.138399  | 0.148246  | -2.348783 |
| H | 0.665895  | 1.455416  | -3.503795 |
| H | -1.029272 | 1.774921  | -3.026143 |
| H | -0.003936 | -0.691556 | 2.628846  |
| H | 0.097960  | 0.733650  | 1.552574  |



|   |           |           |           |
|---|-----------|-----------|-----------|
| H | 1.277828  | -0.614566 | 1.397478  |
| H | 1.957318  | 2.968634  | 2.939414  |
| H | 2.395958  | 4.661980  | 4.706987  |
| H | 2.204553  | 7.085706  | 4.187502  |
| H | 1.568349  | 7.826357  | 1.902628  |
| H | 1.136165  | 6.152460  | 0.120357  |
| H | -5.085000 | -1.526081 | 0.290729  |
| H | -7.176860 | -2.642508 | -0.453266 |
| H | -7.079260 | -4.540161 | -2.054042 |
| H | -4.885748 | -5.345611 | -2.902259 |
| H | -2.780108 | -4.245994 | -2.154696 |
| H | 2.988888  | 2.090833  | 0.796699  |
| H | -1.537397 | -2.084274 | -2.456206 |

Table S15: Cartesian coordinates of the alternative photoproduct of **PT** cyclization, formed *via* the proton transfer MECI

|   |           |           |           |
|---|-----------|-----------|-----------|
| C | 2.357323  | 5.275836  | 0.911107  |
| C | 1.317634  | 4.485257  | 1.424116  |
| C | 0.630144  | 4.844348  | 2.586921  |
| C | 0.964413  | 6.039284  | 3.223567  |
| C | 1.961695  | 6.862943  | 2.690131  |
| C | 2.656062  | 6.481302  | 1.544446  |
| C | 0.910651  | 3.306971  | 0.645097  |
| S | -0.706259 | 3.320403  | -0.060275 |
| C | -0.400087 | 1.775642  | -0.871526 |
| C | 0.951543  | 1.264846  | -0.551872 |
| C | 1.656390  | 2.220151  | 0.292186  |
| C | 1.522619  | 0.102188  | -0.989482 |
| C | 0.894306  | -1.034748 | -1.744399 |
| C | 1.999818  | -2.097817 | -1.943999 |
| C | 3.359284  | -1.444799 | -1.560970 |
| C | 2.984651  | -0.171690 | -0.743442 |
| C | -0.263744 | -1.633587 | -1.010784 |

|   |           |           |           |
|---|-----------|-----------|-----------|
| C | -1.490484 | -1.957417 | -1.664537 |
| C | -2.442761 | -2.432871 | -0.783891 |
| S | -1.862425 | -2.523678 | 0.851490  |
| C | -0.301512 | -1.899567 | 0.356527  |
| C | -3.851600 | -2.702084 | -1.125833 |
| C | -4.256168 | -3.985205 | -1.478595 |
| C | -5.582048 | -4.193587 | -1.862362 |
| C | -6.465704 | -3.123561 | -1.914853 |
| C | -6.049870 | -1.845038 | -1.565406 |
| C | -4.733549 | -1.625245 | -1.159659 |
| C | 0.795535  | -1.733971 | 1.345997  |
| F | 3.785535  | 0.879566  | -1.081616 |
| F | 3.280626  | -0.350581 | 0.579062  |
| F | 4.066552  | -1.116434 | -2.671821 |
| F | 4.172637  | -2.283792 | -0.874624 |
| F | 2.021626  | -2.551925 | -3.230854 |
| F | 1.795777  | -3.224776 | -1.214278 |
| C | -1.316663 | 1.249465  | -1.703142 |
| H | 0.580937  | -0.692797 | -2.765204 |
| H | -1.169309 | 0.300547  | -2.187971 |
| H | -2.253847 | 1.747247  | -1.911294 |
| H | 0.536487  | -2.169656 | 2.318937  |
| H | 0.995975  | -0.662262 | 1.480264  |
| H | 1.698290  | -2.234050 | 0.969049  |
| H | -0.164460 | 4.207717  | 2.979326  |
| H | 0.430102  | 6.350424  | 4.125189  |
| H | 2.193797  | 7.817980  | 3.175172  |
| H | 3.427945  | 7.133212  | 1.126426  |
| H | 2.890192  | 4.967846  | 0.009410  |
| H | -4.396844 | -0.626872 | -0.873315 |
| H | -6.754597 | -1.010319 | -1.606125 |
| H | -7.500730 | -3.288326 | -2.233240 |
| H | -5.918577 | -5.200412 | -2.123640 |
| H | -3.547206 | -4.814368 | -1.441435 |

|   |           |           |           |
|---|-----------|-----------|-----------|
| H | 2.669940  | 2.073342  | 0.628118  |
| H | -1.668504 | -1.865321 | -2.729278 |

Table S16: Cartesian coordinates of **PT-twist**, at the optimised local minimum of the  $T_1$  state.

|   |           |           |           |
|---|-----------|-----------|-----------|
| C | -0.159445 | 4.937430  | 1.205940  |
| C | 0.053807  | 3.542054  | 1.209414  |
| C | -0.351416 | 2.791188  | 2.330904  |
| C | -0.934868 | 3.420427  | 3.420380  |
| C | -1.138657 | 4.801674  | 3.411884  |
| C | -0.754395 | 5.547956  | 2.300031  |
| C | 0.700182  | 2.878215  | 0.104351  |
| S | 1.076071  | 3.712260  | -1.416631 |
| C | 1.473054  | 2.170477  | -2.218333 |
| C | 1.545427  | 1.091017  | -1.168379 |
| C | 1.005638  | 1.490139  | 0.041190  |
| C | 2.005295  | -0.231416 | -1.460955 |
| C | 1.483058  | -1.388969 | -0.965140 |
| C | 2.252613  | -2.608949 | -1.420908 |
| C | 3.407247  | -2.061660 | -2.325007 |
| C | 3.195435  | -0.509283 | -2.366277 |
| C | 0.277902  | -1.510612 | -0.158151 |
| C | -1.027544 | -1.561486 | -0.738850 |
| C | -2.021697 | -1.576174 | 0.221118  |
| S | -1.383625 | -1.584247 | 1.852537  |
| C | 0.253016  | -1.506050 | 1.230235  |
| C | -3.466135 | -1.549043 | -0.047596 |
| C | -4.007013 | -2.521993 | -0.889785 |
| C | -5.358295 | -2.455463 | -1.220728 |
| C | -6.152298 | -1.423821 | -0.729391 |
| C | -5.606838 | -0.463051 | 0.115800  |
| C | -4.260306 | -0.522966 | 0.468810  |
| C | 1.434242  | -1.561344 | 2.130246  |
| F | 3.008438  | -0.081827 | -3.646032 |

|   |           |           |           |
|---|-----------|-----------|-----------|
| F | 4.311396  | 0.153396  | -1.970395 |
| F | 3.378505  | -2.607682 | -3.564188 |
| F | 4.631086  | -2.383448 | -1.841586 |
| F | 1.474343  | -3.502474 | -2.086899 |
| F | 2.734317  | -3.335607 | -0.373754 |
| C | 0.746566  | 1.822748  | -3.474117 |
| H | 0.733756  | 2.670845  | -4.167372 |
| H | -0.289996 | 1.533353  | -3.241860 |
| H | 1.249727  | 0.977336  | -3.953567 |
| H | 2.279919  | -1.041080 | 1.656850  |
| H | 1.706513  | -2.616227 | 2.283773  |
| H | 1.225157  | -1.098623 | 3.103893  |
| H | -0.219048 | 1.703123  | 2.351084  |
| H | -1.241915 | 2.828784  | 4.288237  |
| H | -1.599558 | 5.297453  | 4.271620  |
| H | -0.920034 | 6.630384  | 2.292257  |
| H | 0.143357  | 5.551792  | 0.356334  |
| H | -3.828972 | 0.230597  | 1.131772  |
| H | -6.234599 | 0.344756  | 0.505055  |
| H | -7.211400 | -1.373323 | -1.002898 |
| H | -5.796078 | -3.221852 | -1.867836 |
| H | -3.379847 | -3.328996 | -1.276308 |
| H | 0.861481  | 0.831669  | 0.888705  |
| H | -1.209278 | -1.565795 | -1.805238 |
